# Supplementary material for: Epidemiologic Observations from Passive and Targeted Surveillance during the First Wave of the 2009 H1N1 Influenza Pandemic in Milwaukee, WI
Source: Viruses. 2010 Mar 25;2(4):782–95. doi: 10.3390/v2040782 (PMC2905828; doi:10.3390/v2040782)
Supplement: Supplementary file 1 [file viruses-02-00782-s001.pdf]

Supplementary Tables and Figures for article “Epidemiologic Observations from Passive and Targeted Surveillance during the First Wave of the 2009 H1N1 Influenza Pandemic in Milwaukee, WI”, published 25 March 2010.

**Table S 1.** Rate of H1N1pdm Infection in Individuals Tested in Milwaukee County by Age and Gender.

| <b>MALES*</b>                            | <b>&lt; 2Yrs</b> | <b>2-4 yrs</b> | <b>5-18 yrs</b> | <b>19-24 yrs</b> | <b>25-49yrs</b> | <b>50-64yrs</b> | <b>≥ 65yrs</b>  | <b>Total</b> |
|------------------------------------------|------------------|----------------|-----------------|------------------|-----------------|-----------------|-----------------|--------------|
| Number positive                          | 110              | 190            | 886             | 43               | 94              | 23              | 3               | 1349         |
| Number tested                            | 813              | 642            | 1702            | 109              | 474             | 241             | 142             | 4123         |
| Positivity rate (%)                      | 13.5             | 29.6           | 52.1            | 39               | 19.7            | 9.5             | 2.1             | 32.7         |
| Age Distribution of Positive Males (%)   | 8.1              | 14.1           | 65.7            | 3.2              | 6.9             | 1.7             | 0.2             | 100%         |
|                                          |                  |                |                 |                  |                 |                 |                 |              |
| <b>FEMALES**</b>                         | <b>&lt; 2Yrs</b> | <b>2-4 yrs</b> | <b>5-18 yrs</b> | <b>19-24 yrs</b> | <b>25-49yrs</b> | <b>50-64yrs</b> | <b>≥ 65 yrs</b> | <b>Total</b> |
| Number positive                          | 95               | 182            | 725             | 62               | 225             | 48              | 7               | 1344         |
| Number tested                            | 659              | 567            | 1717            | 317              | 1159            | 401             | 185             | 5005         |
| Positivity rate (%)                      | 14.4             | 32             | 42.2            | 19.5             | 19.4            | 11.9            | 3.8             | 26.8         |
| Age Distribution of Positive Females (%) | 7.0              | 13.6           | 54.0            | 4.6              | 16.7            | 3.6             | 0.5             | 100%         |
| Ratio of M/F tested                      | 1.2              | 1.13           | 0.99            | 0.35             | 0.41            | 0.60            | 0.77            | 0.82         |

**Table S 1. Cont.**

|                                             |      |         |        |       |        |        |        |        |
|---------------------------------------------|------|---------|--------|-------|--------|--------|--------|--------|
| <b>Total positive patients</b>              | 205  | 372     | 1612   | 105   | 318    | 71     | 10     | 2693*  |
| Total tested patients                       | 1472 | 1209    | 3419   | 427   | 1633   | 641    | 327    | 9128*  |
| Positive Rate (%)                           | 13.9 | 30.7    | 47     | 24.5  | 19.4   | 11.0   | 3.1    | 29.5   |
| Age Distribution of Positive patients (%)   | 7.6  | 13.8    | 59.9   | 3.9   | 11.8   | 2.6    | 0.4    | 100%   |
| Ratio of M/F tested                         | 1.2  | 1.13    | 0.99   | 0.35  | 0.41   | 0.60   | 0.77   | 0.82   |
|                                             |      |         |        |       |        |        |        |        |
| Estimated infected                          |      |         |        |       |        |        |        |        |
| MC-symptomatic                              | 3092 | 5614    | 24367  | 1586  | 4800   | 1058   | 163    | 40679  |
| Estimated infected                          |      |         |        |       |        |        |        |        |
| MC-asymptomatic                             | 4393 | 7978    | 34626  | 2255  | 6821   | 1503   | 231    | 57807  |
| Total infected MC                           | 7485 | 13592   | 58993  | 3841  | 11621  | 2561   | 394    | 98486  |
| MC populations                              |      | 74434** | 190198 | 78234 | 328640 | 171399 | 110423 | 953328 |
| Percentage MC infected-1 <sup>st</sup> Wave |      | 28.3    | 31.0   | 4.9   | 3.5    | 1.5    | 0.4    | 10.3   |

48/2741 positive and 48/9176 tested patients did not have gender available and were excluded from this analysis. \*\* Milwaukee county population < 5 years of age.

**Table S 2. Infection rates per 100,000 MC population by age and gender.**

|                 | <b>Males</b> | <b>Females</b> | <b>Total</b> |
|-----------------|--------------|----------------|--------------|
| <b>&lt; 5</b>   | 1109.0       | 1067.6         | 1101.9       |
| <b>5-18 yrs</b> | 1197.7       | 1015.1         | 1131.4       |
| <b>19-24</b>    | 187.6        | 271.9          | 231.8        |
| <b>25-49</b>    | 81.6         | 189.3          | 138.5        |
| <b>50-64</b>    | 39.2         | 75.7           | 59.0         |
| <b>&gt;=65</b>  | 9.7          | 14.7           | 12.7         |
| <b>5-24 yrs</b> | 958.7        | 835.2          | 916.2        |

**Table S 3. Hospitalization rates per 100,000 MC population by age and gender.**

|                 | <b>Males</b> | <b>Females</b> | <b>Total</b> |
|-----------------|--------------|----------------|--------------|
| <b>&lt; 5</b>   | 60.3         | 37.2           | 49           |
| <b>5-18 yrs</b> | 19           | 17.7           | 18.4         |
| <b>19-24</b>    | 6.5          | 19.5           | 13           |
| <b>25-49</b>    | 6.4          | 5              | 5.7          |
| <b>50-64</b>    | 6.3          | 5.8            | 6.1          |
| <b>&gt;=65</b>  | 0            | 4.7            | 2.8          |
| <b>5-24 yrs</b> | 16.1         | 18.1           | 17.1         |

**Figure S 1.** Influenza A virus activity over the 2008-2009 winter spring and summer seasons by subtypes detected in Milwaukee, WI. H1N1h and H3N2 are the seasonal human subtypes of influenza A. H1N1pdm is the pandemic H1N1 subtype. Arrow 1: surveillance criteria changed to testing only high risk or hospitalized patients Arrow 2: Schools closed in Milwaukee

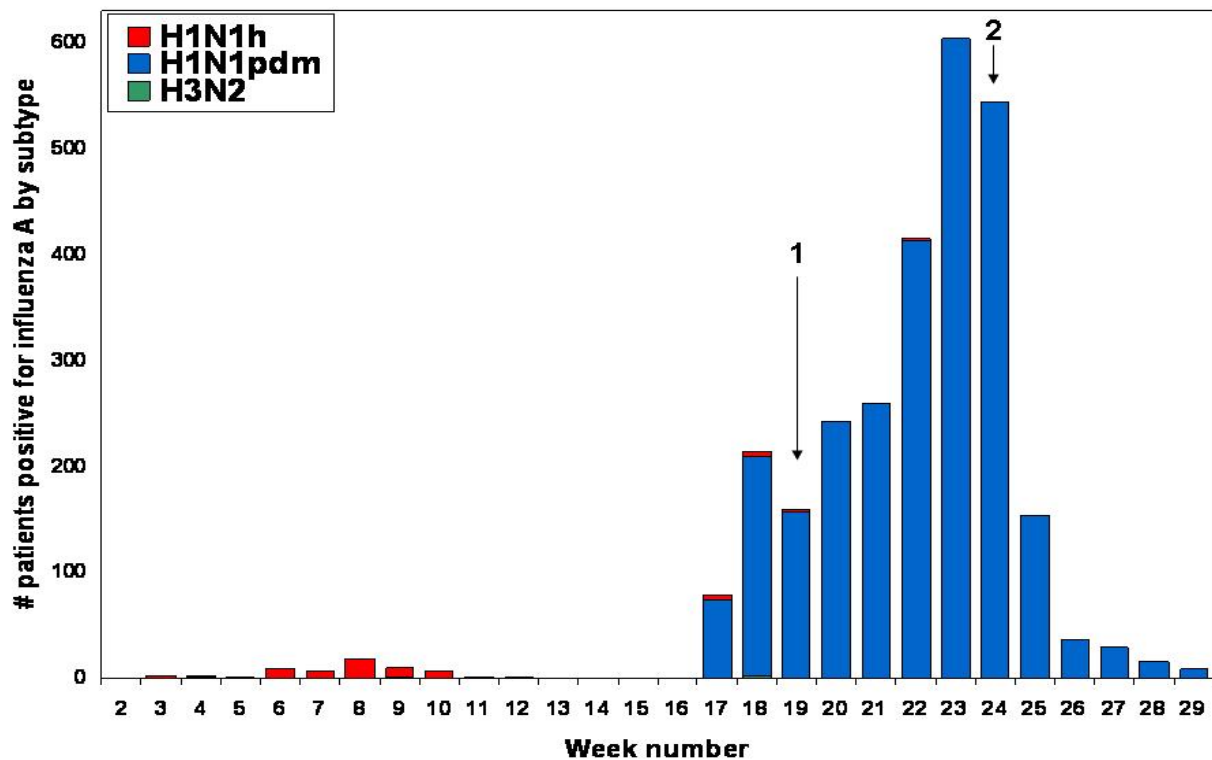

**Figure S 2.** Age distribution of patients infected with the H1N1pdm virus, by week of enhanced surveillance; \* Week of school closure.

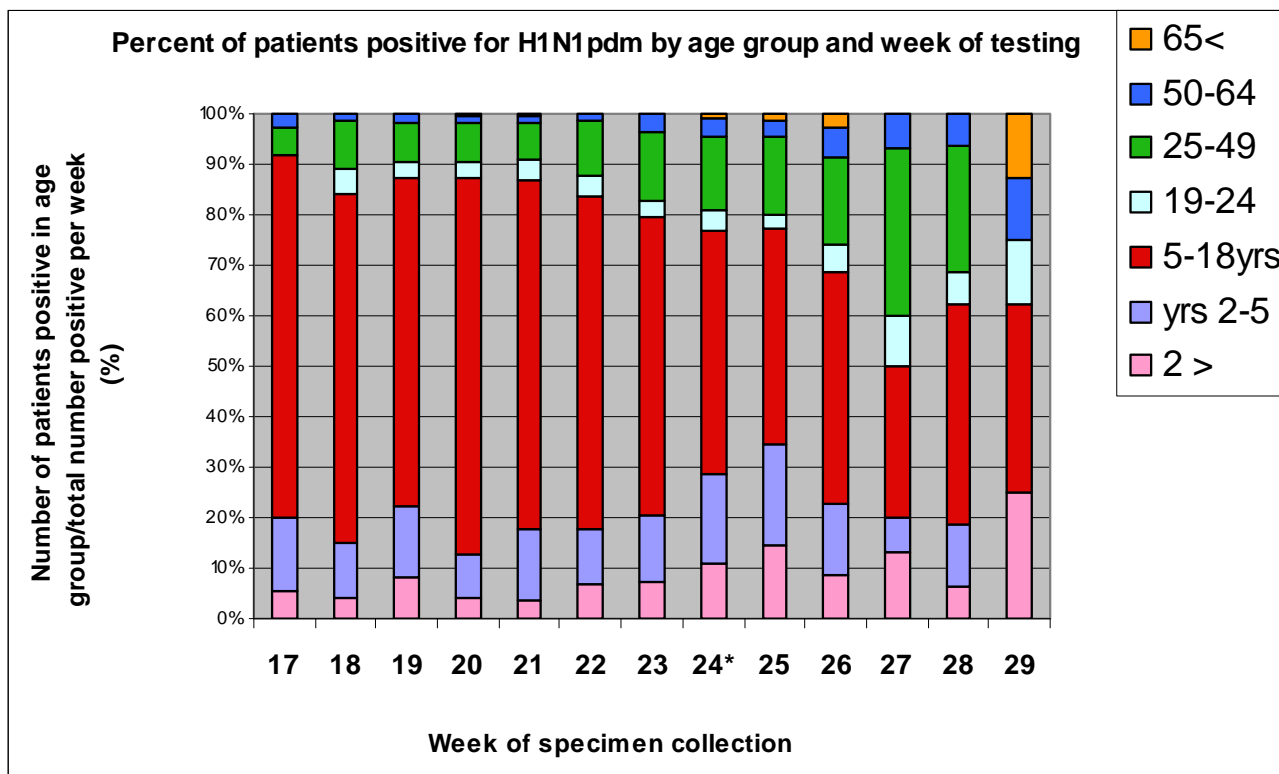

**Figure S 3.** Age distribution of patients infected with the H1N1pdm virus, by week of enhanced surveillance.

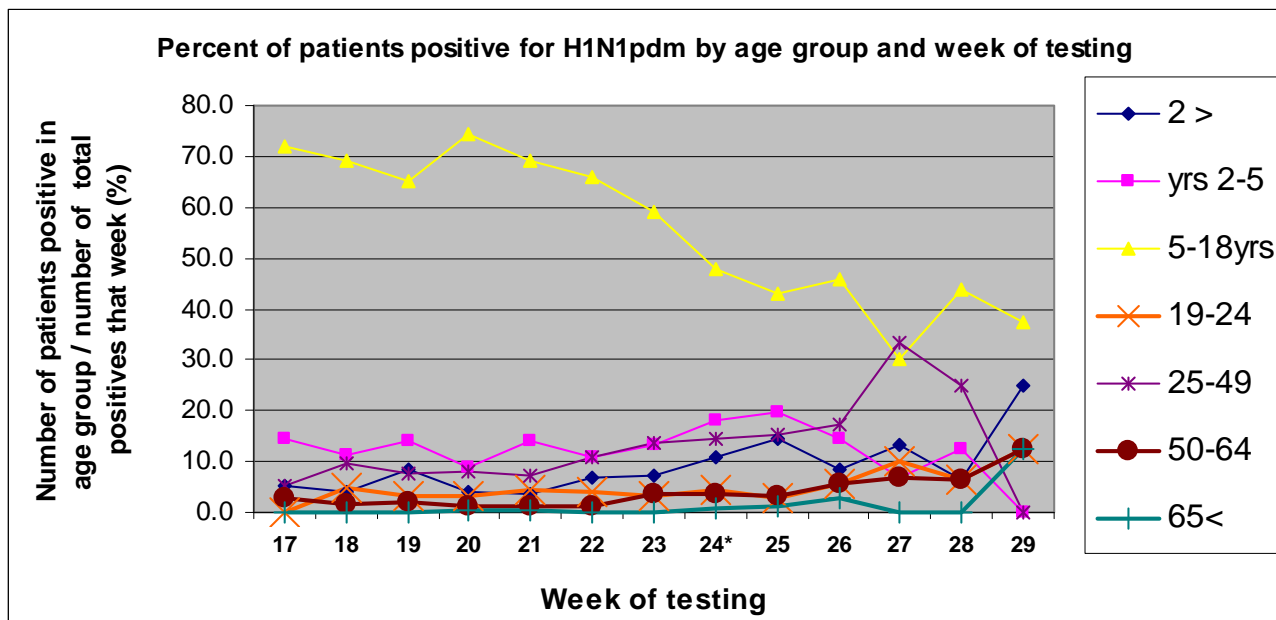

\* Week of school closure.

**Figure S 4.** Age distribution of H1N1pdm laboratory detection rates, by week of enhanced surveillance.

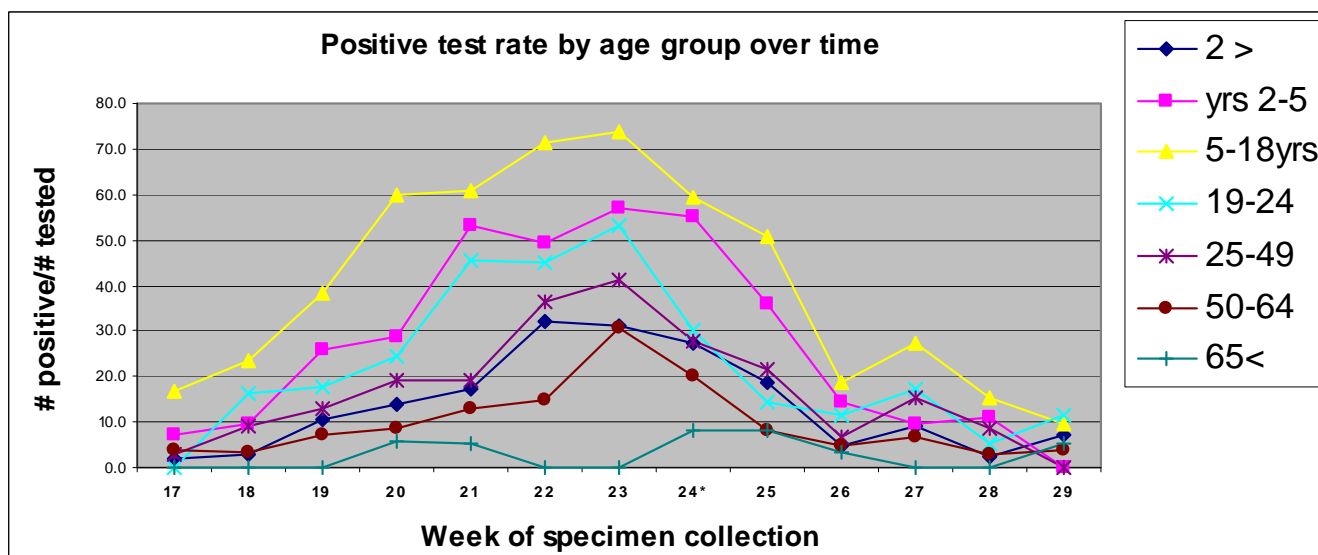

\* Week of school closure.

**Figure S 5.** H1N1pdm Infection Rates per 100,000 MC population by age and sex.

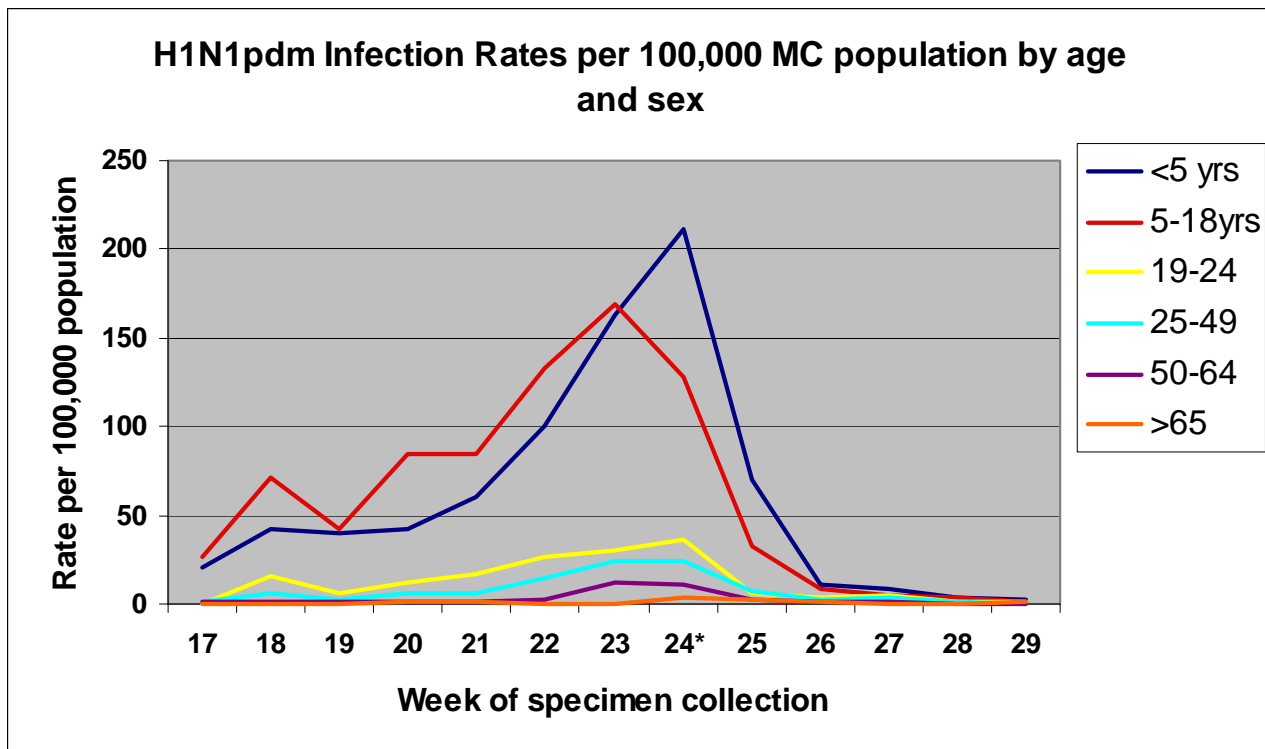

\* Week of school closure.

# **Statistical methods for estimating number of infected individuals in the first pandemic wave.**

The ideal way to allow for disparity in demographics of the sample and the Milwaukee population would be to weight differently depending on age, gender and race over the weeks since we know that there was variation in all of these. However the small numbers (N=614) enrolled in targeted surveillance precluded weightage using all three demographic variables. Data from the American community survey (1) was examined to see how the age distribution and gender distribution varied over races. Although there was some variation it was relatively low with the major disparity being the racial distribution. Therefore we weighted our estimates taking into account the Milwaukee rates for race.

In the calculation we only weighted the AA, Caucasian and Hispanic races since our other races were extremely low in numbers. Since ILI data for MC for the last 4 weeks (week 26-29 data not published) and the “symptomatic” data for the first 3 weeks (targeted surveillance initiated in week 20) were not available, the data were assumed to be approximately symmetrical and values from the other side of the curve were imputed. Because of the variation of week by week which could be artificial, we chose to also estimate the variation over time by using a moving average of three weeks since a subject could be positive over two weeks and possibly lasting up to three weeks, at the end of the period we assumed 0 cases.

**Table S 4.:** Adjusting positive test rates in symptomatic subjects in targeted surveillance.

| Row # | Race         | # Tested (A)* | # Positive (B)* | Targeted surveillance Population Proportion (C)* | MC Population Proportion (D)* | Relative weight (E)* | Absolute weight (F)* | Adjusted # Tested (G)* | Adjusted # Positive (H)* | Overall weight (I)* |
|-------|--------------|---------------|-----------------|--------------------------------------------------|-------------------------------|----------------------|----------------------|------------------------|--------------------------|---------------------|
| 1     | Latino       | 82            |                 | 0.33                                             | 0.12                          | 0.36                 | 0.12                 | 29.48                  |                          |                     |
| 2     | Latino       |               | 23              |                                                  |                               |                      |                      |                        | 8.27                     |                     |
| 3     | Blacks       | 92            |                 | 0.37                                             | 0.25                          | 0.67                 | 0.22                 | 54.74                  |                          |                     |
| 4     | Blacks       |               | 16              |                                                  |                               |                      |                      |                        | 9.52                     |                     |
| 5     | Caucasians   | 72            |                 | 0.29                                             | 0.58                          | 1.97                 | 0.66                 | 161.73                 |                          |                     |
| 6     | Caucasians   |               | 3               |                                                  |                               |                      |                      |                        | 6.74                     |                     |
| 7     | <b>Total</b> | 246           | 42              |                                                  |                               | 3                    | 1                    |                        | 24.53                    | 0.58                |

\*E=D/C; F1=E1/E7; G=F\*A7; H2= B2/A1; I=H7/B7

**Table S 5.** Adjusting positive test rates in asymptomatic subjects in active surveillance.

| Row # | Race         | # Tested (A)* | # Positive (B)* | Targeted surveillance population Proportion (C)* | MC Population Proportion (D)* | Relative weight (E)* | Absolute weight (F)* | Adjusted # Tested (G)* | Adjusted # Positive (H)* | Overall weight (I)* |
|-------|--------------|---------------|-----------------|--------------------------------------------------|-------------------------------|----------------------|----------------------|------------------------|--------------------------|---------------------|
| 1     | Latino       | 70            |                 | 0.2                                              | 0.12                          | 0.6                  | 0.22                 | 77.8                   |                          |                     |
| 2     | Latino       |               | 1               |                                                  |                               |                      |                      |                        | 1.106                    |                     |
| 3     | Blacks       | 156           |                 | 0.44                                             | 0.25                          | 0.56                 | 0.2                  | 72                     |                          |                     |
| 4     | Blacks       |               | 4               |                                                  |                               |                      |                      |                        | 1.857                    |                     |
| 5     | Caucasians   | 128           |                 | 0.36                                             | 0.58                          | 1.6                  | 0.58                 | 204                    |                          |                     |
| 6     | Caucasians   |               | 0               |                                                  |                               |                      |                      |                        |                          |                     |
| 7     | <b>Total</b> | 354           | 5               |                                                  |                               | 2.76                 | 1                    | 353.8                  | 2.96                     | 0.59                |

\*E=D/C; F1=E1/E7; G=F\*A7; H2= B2/A1; I=H7/B7.

**Table S 6.** Calculation of number of infected symptomatics in MC by week

| week # | %ILI <sup>@</sup> [A] | % SS* who have ILI (active surveillance) [B] | % SS in the community [C] | % of SS who were positive in active surveillance [D] | MC Population [E] | Number of SS [F] | Number of infected SS [G] | Number of infected SS (adjusted) [H] | Weight applied [I] |
|--------|-----------------------|----------------------------------------------|---------------------------|------------------------------------------------------|-------------------|------------------|---------------------------|--------------------------------------|--------------------|
| 17     | 5.00                  | 25.00                                        | 20.00                     | 8.30                                                 | 953328            | 190666           | 15825                     | 9242                                 | 0.58               |
| 18     | 2.50                  | 37.50                                        | 6.67                      | 7.70                                                 | 953328            | 63555            | 4894                      | 2858                                 | 0.58               |
| 19     | 0.80                  | 37.50                                        | 2.13                      | 5.00                                                 | 953328            | 20338            | 1017                      | 594                                  | 0.58               |
| 20     | 1.50                  | 50.00                                        | 3.00                      | 18.75                                                | 953328            | 28600            | 5362                      | 3132                                 | 0.58               |
| 21     | 0.20                  | 28.00                                        | 0.71                      | 12.00                                                | 953328            | 6809             | 817                       | 477                                  | 0.58               |
| 22     | 2.00                  | 53.85                                        | 3.71                      | 15.38                                                | 953328            | 35409            | 5448                      | 3181                                 | 0.58               |
| 23     | 2.40                  | 60.87                                        | 3.94                      | 45.65                                                | 953328            | 37588            | 17160                     | 10021                                | 0.58               |
| 24     | 4.00                  | 65.79                                        | 6.08                      | 18.42                                                | 953328            | 57962            | 10677                     | 6236                                 | 0.58               |
| 25     | 2.20                  | 41.46                                        | 5.31                      | 5.00                                                 | 953328            | 50582            | 2529                      | 1477                                 | 0.58               |
| 26     | 1.80                  | 53.85                                        | 3.34                      | 7.69                                                 | 953328            | 31868            | 2451                      | 1432                                 | 0.58               |
| 27     | 0.20                  | 37.50                                        | 0.53                      | 8.33                                                 | 953328            | 5084             | 424                       | 247                                  | 0.58               |
| 28     | 1.30                  | 37.50                                        | 3.47                      | 0.00                                                 | 953328            | 33049            | 0                         | 0                                    | 0.58               |
| 29     | 0.60                  | 25.00                                        | 2.40                      | 13.33                                                | 953328            | 22880            | 3051                      | 1782                                 | 0.58               |
|        |                       |                                              |                           |                                                      |                   |                  |                           | 40679                                |                    |

C=(A/B) X100; F= E X C; G= D X F; H=G X I

\* SS, symptomatic subjects, <sup>@</sup>, ILI, influenza like illness
